# Supplementary material for: Phylogenetic and Functional Assessment of Orthologs Inference Projects and Methods
Source: PLoS Comput Biol. 2009 Jan 16;5(1):e1000262. doi: 10.1371/journal.pcbi.1000262 (PMC2612752; doi:10.1371/journal.pcbi.1000262)
Supplement: Table S1 — Overview of some project mapping key numbers. Indicated are the number of species, the number of proteins, the average number of orthologs per protein and the number of orthologs per protein normalized by the number of species for the original and the mapped data. We see that the mapped data constitute a reasonable sample of the original data. (0.02 MB PDF) [file pcbi.1000262.s015.pdf]

| Projects        | Original data |           |                    |                         | Mapped data |           |       |                    |                         |
|-----------------|---------------|-----------|--------------------|-------------------------|-------------|-----------|-------|--------------------|-------------------------|
|                 | species       | sequences | $\frac{pred}{seq}$ | $\frac{pred}{seq(n-1)}$ | species     | sequences | pred  | $\frac{pred}{seq}$ | $\frac{pred}{seq(n-1)}$ |
| COG             | 66            | 192987    | 90.3               | 1.389                   | 63          | 81.5%     | 66.2% | 73.4               | 1.184                   |
| KOG             | 7             | 112920    | 21.2               | 3.541                   | 7           | 50.0%     | 24.2% | 10.3               | 1.713                   |
| EggNOG          | 373           | 1513782   | 702.9              | 1.889                   | 190         | 47.1%     | 21.1% | 314.4              | 1.664                   |
| OrthoMCL        | 56            | 632455    | 16.1               | 0.293                   | 46          | 45.0%     | 25.1% | 9.0                | 0.199                   |
| Inparanoid      | 35            | 610047    | 29.5               | 0.868                   | 33          | 69.6%     | 42.6% | 18.1               | 0.565                   |
| Homologene      | 19            | 198758    | 6.2                | 0.346                   | 17          | 51.1%     | 28.4% | 3.5                | 0.216                   |
| Ensembl Compara | 35            | 792504    | 19.2               | 0.566                   | 35          | 74.0%     | 80.1% | 20.8               | 0.612                   |
| RoundUp         | 220           | 1152167   | 21.6               | 0.099                   | 210         | 67.3%     | 78.7% | 25.3               | 0.121                   |
| OMA Pairwise    | 550           | 2477966   | 62.6               | 0.114                   |             |           |       |                    |                         |
| OMA Group       | 550           | 2477966   | 28.9               | 0.053                   |             |           |       |                    |                         |
| RSD             | 550           | 2477966   | 78.4               | 0.143                   |             |           |       |                    |                         |
| BBH             | 550           | 2477966   | 77.7               | 0.141                   |             |           |       |                    |                         |

**Table S1: Overview of some project mapping key numbers.** Indicated are the number of species, the number of proteins, the average number of orthologs per protein and the number of orthologs per protein normalized by the number of species for the original and the mapped data. We see that the mapped data constitute a reasonable sample of the original data.
